# Supplementary material for: Cyclotriphosphazene appended porphyrins and fulleropyrrolidine complexes as supramolecular multiple photosynthetic reaction centers: steady and excited states photophysical investigation
Source: Royal Society of Chemistry journal article supplement (doi:10.1039/c3cp54269f), 2014-01-01
Supplement: c3cp54269f.pdf [file c3cp54269f.pdf]

## Supporting Information for

# Cyclotriphosphazene Appended Porphyrins and Fulleropyrrolidine Complexes as Supramolecular Multiple Photosynthetic Reaction Centers: Steady and Excited States Photophysical Investigation

*Vishnu Sukumaran Nair*<sup>1,2</sup>, *Yogita Pareek*<sup>3</sup>, *Venugopal Karunakaran*<sup>\*1</sup>,  
*Mangalampalli Ravikanth*<sup>\*3</sup>, *Ayyappanpillai Ajayaghosh*<sup>\*1,2</sup>

<sup>1</sup>Photosciences and Photonics Section, Chemical Sciences and Technology Division, National Institute for Interdisciplinary Science and Technology, CSIR, Thiruvananthapuram 695 019, Kerala, India. <sup>2</sup>Academy of Scientific and Innovative Research (AcSIR), New Delhi 110 001, India. <sup>3</sup>Department of Chemistry, Indian Institute of Technology Bombay, Powai, Mumbai 400 076, India.

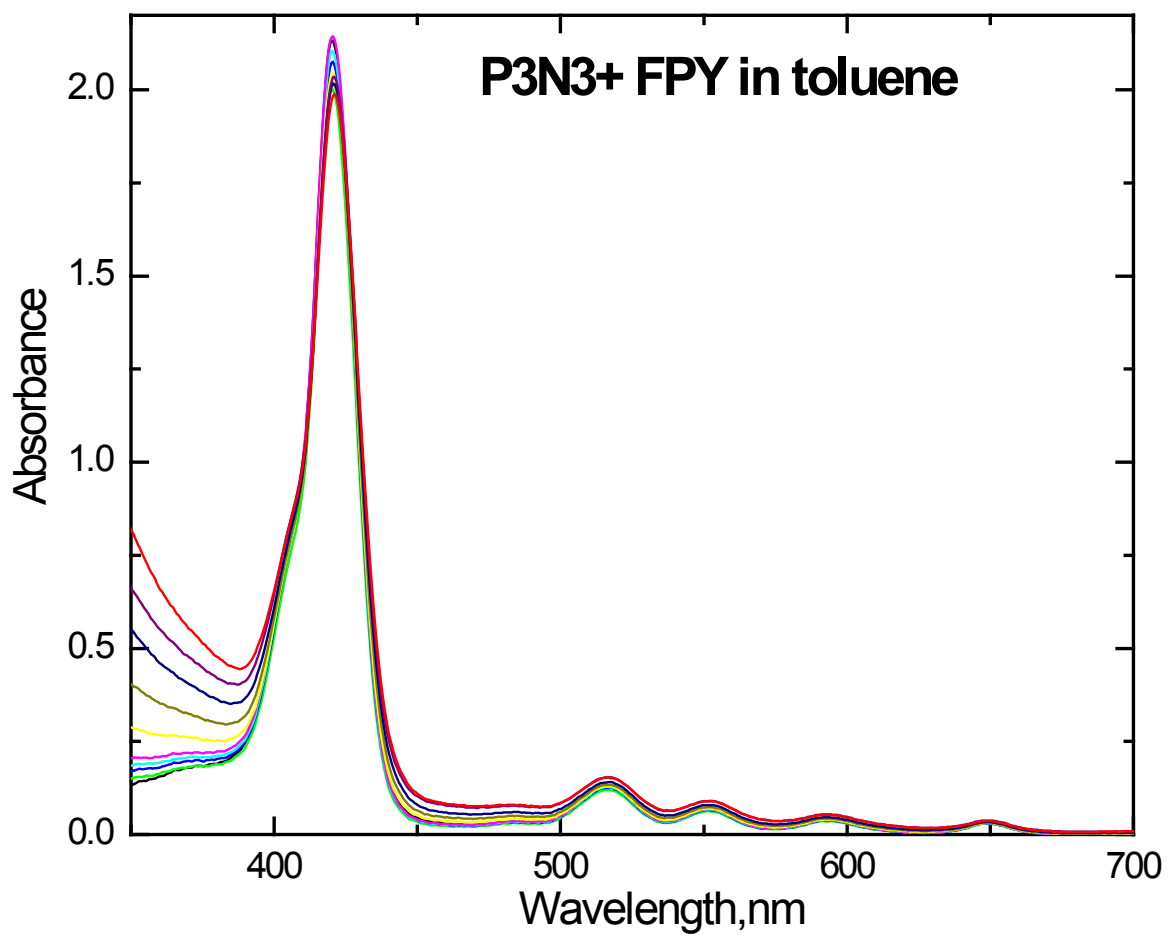

**Figure S1** The absorption spectral changes of **P3N3** ( $3 \times 10^{-5}$  M) with increase of concentration of **FPY** ( $6 \times 10^{-6}$  to  $3 \times 10^{-4}$  M) in toluene.

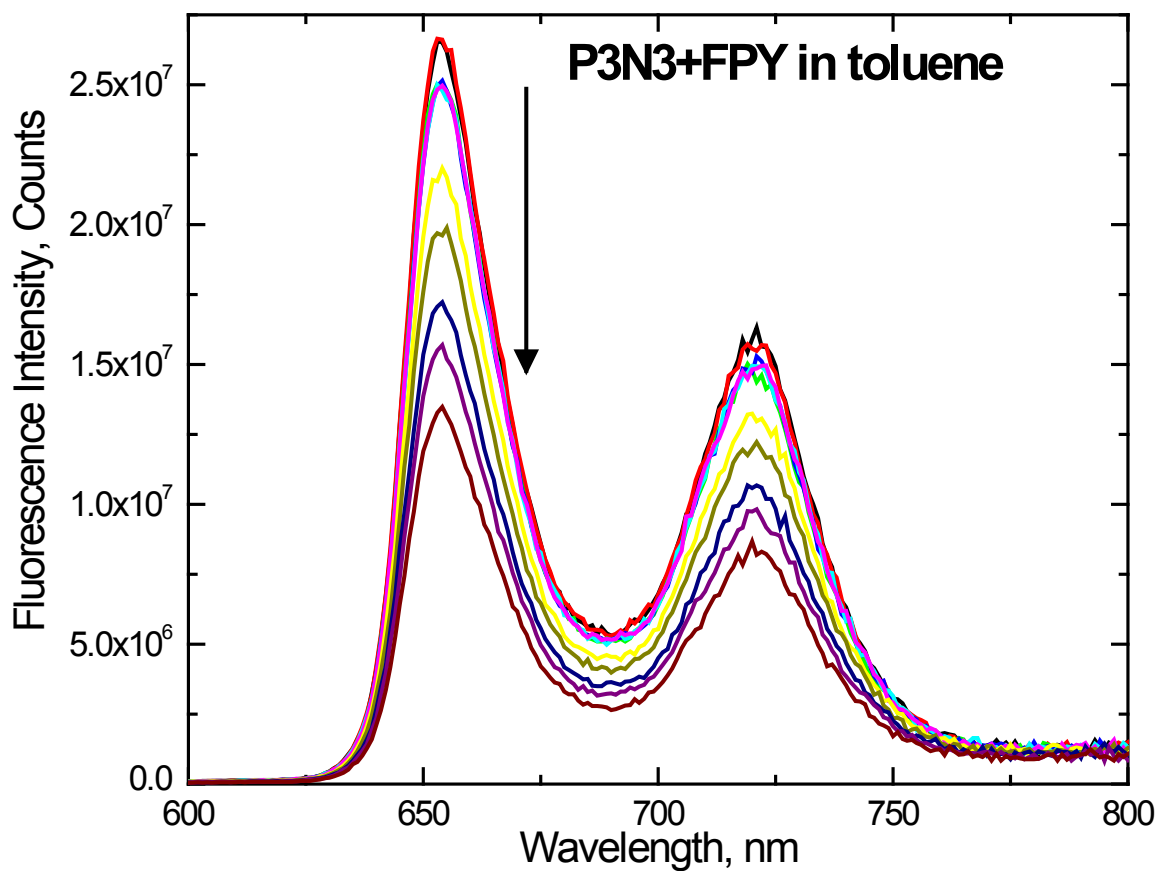

**Figure S2** The emission spectral changes of **P3N3** ( $3 \times 10^{-5}$  M) with increase of concentration of **FPY** ( $6 \times 10^{-6}$  to  $3 \times 10^{-4}$  M) in toluene. Excitation wavelength is 420 nm.

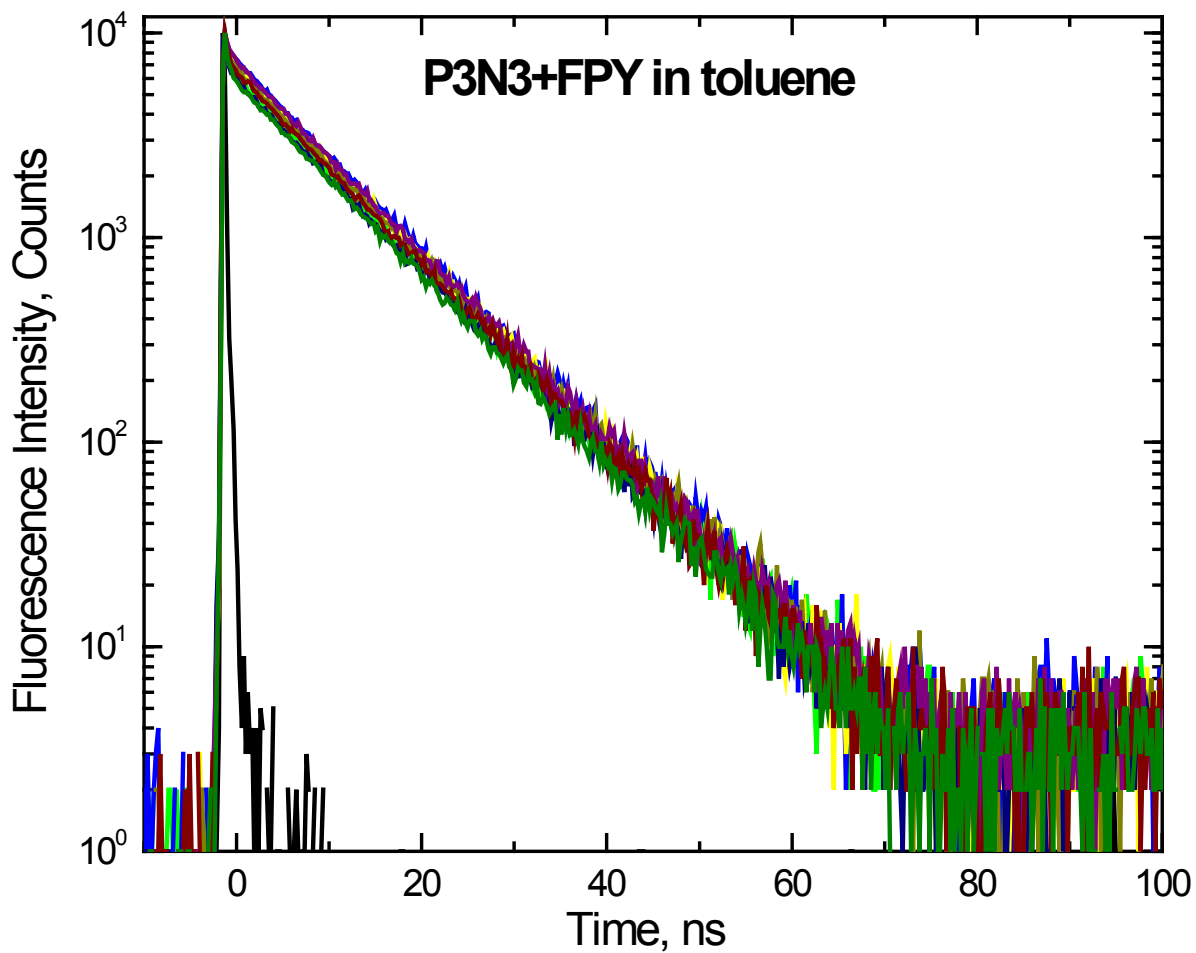

**Figure S3** The fluorescence decay curves of **P3N3** ( $3 \times 10^{-5}$  M) with increasing concentration of **FPY** ( $6 \times 10^{-6}$  to  $3 \times 10^{-4}$  M) in toluene. Samples were excited using 440 nm LED (200 ps) source, and emission monitored at 650 nm.

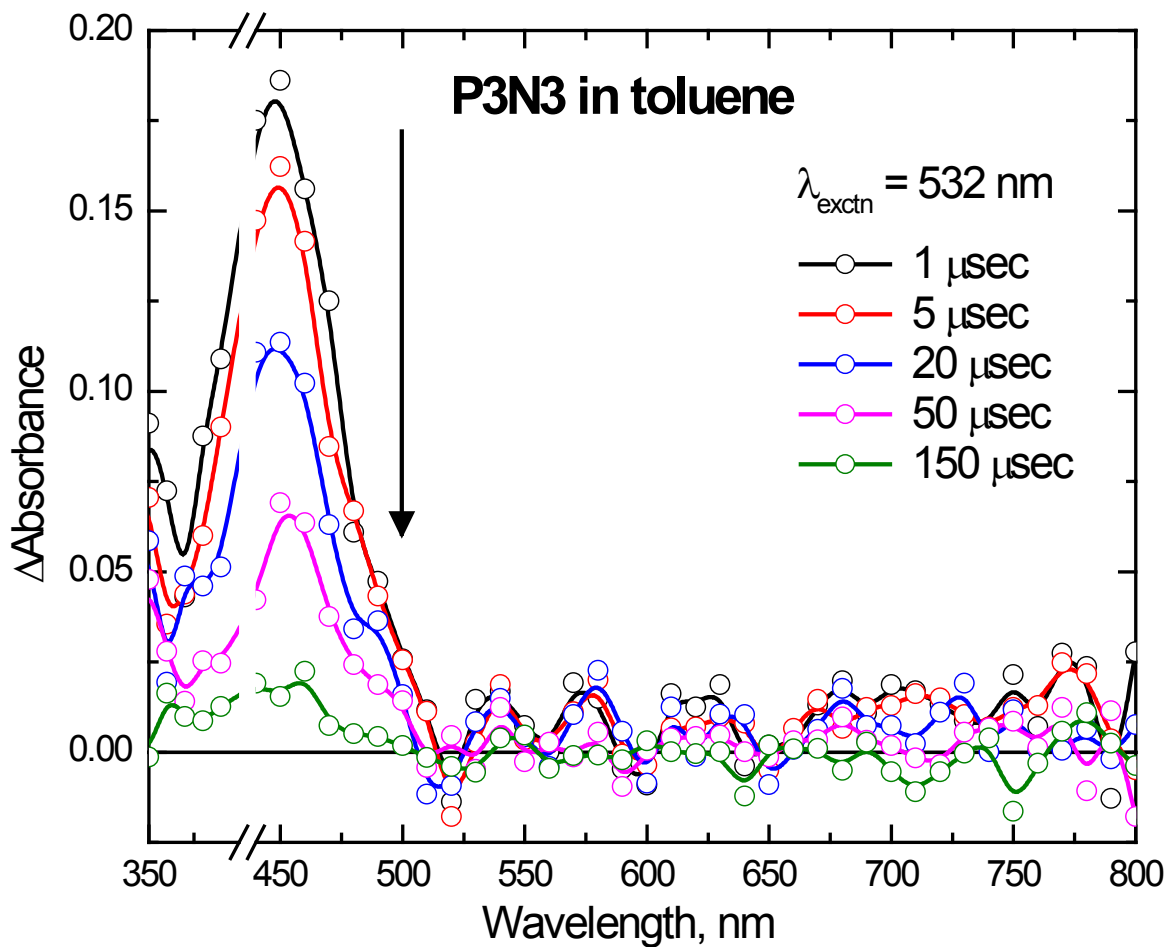

**Figure S4** The nanosecond transient absorption spectra of **P3N3** ( $1 \times 10^{-4} \text{ M}$ ) in toluene obtained by laser flash photolysis exciting at 532 nm in Ar saturated toluene. The spectra at different time scales are given in insets.

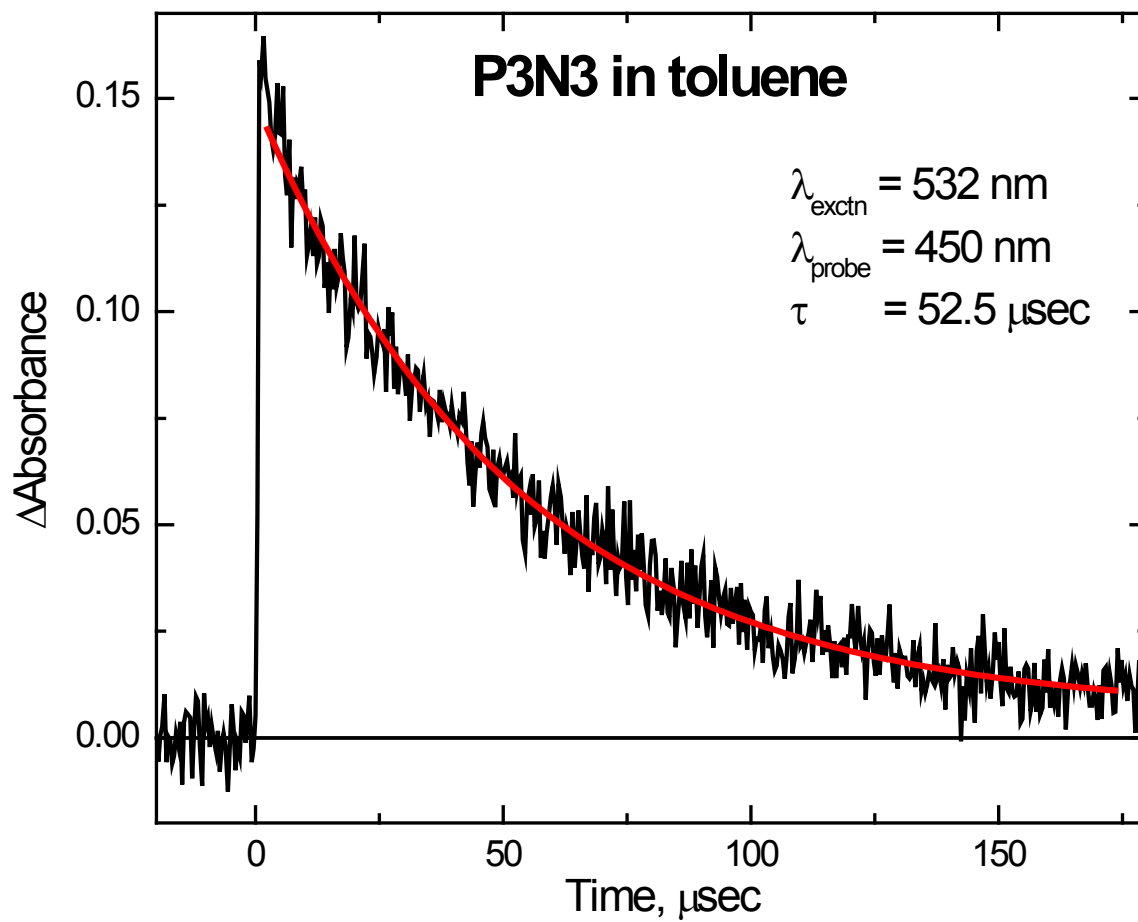

**Figure S5** The transient kinetic decays of **P3N3** ( $1 \times 10^{-4}$  M) probed at 450 nm in the argon saturated toluene. The triplet of **P3N3** has a lifetime of about 52.5  $\mu\text{sec}$ .

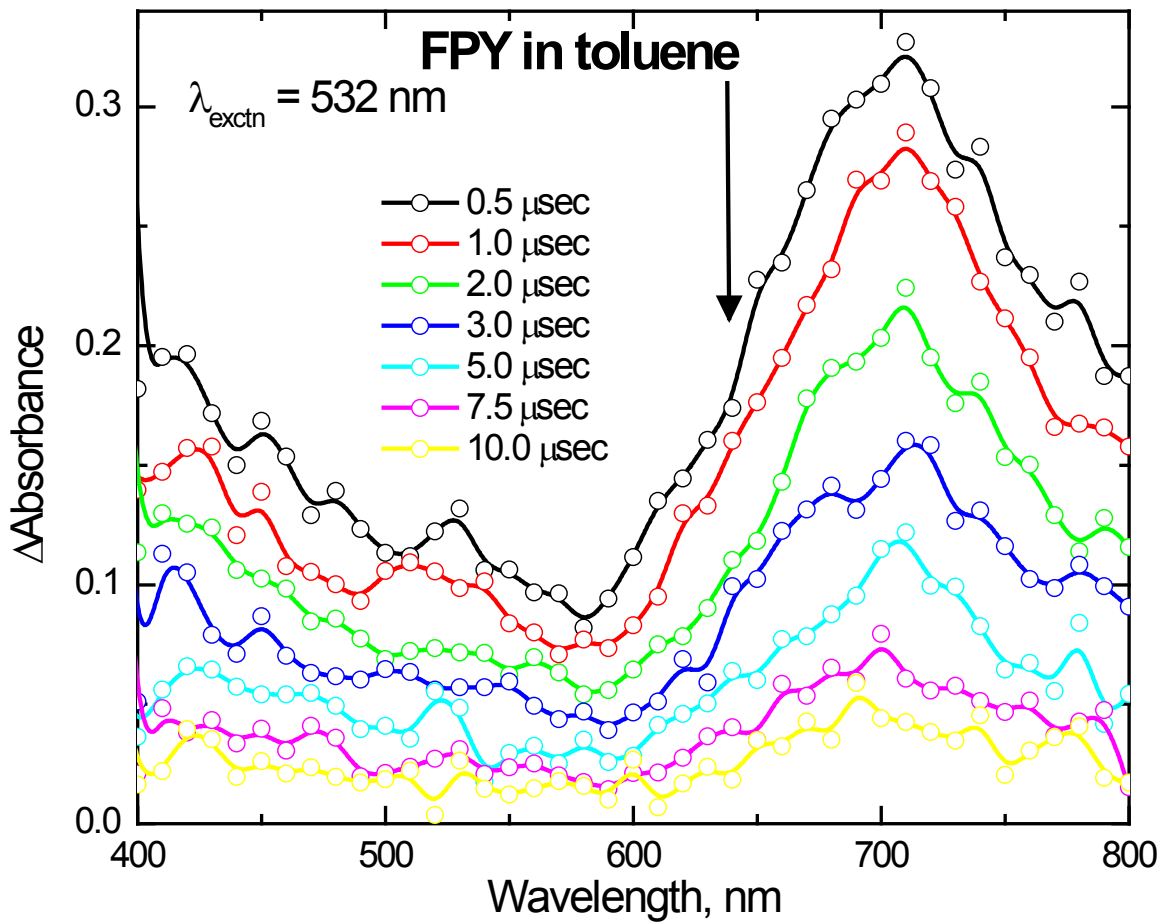

**Figure S6** Nanosecond transient absorption spectra of **FPY** ( $6 \times 10^{-4} \text{ M}$ ) obtained by laser flash photolysis exciting at 532 nm in Ar saturated toluene. The spectra at different time scales are given in insets.

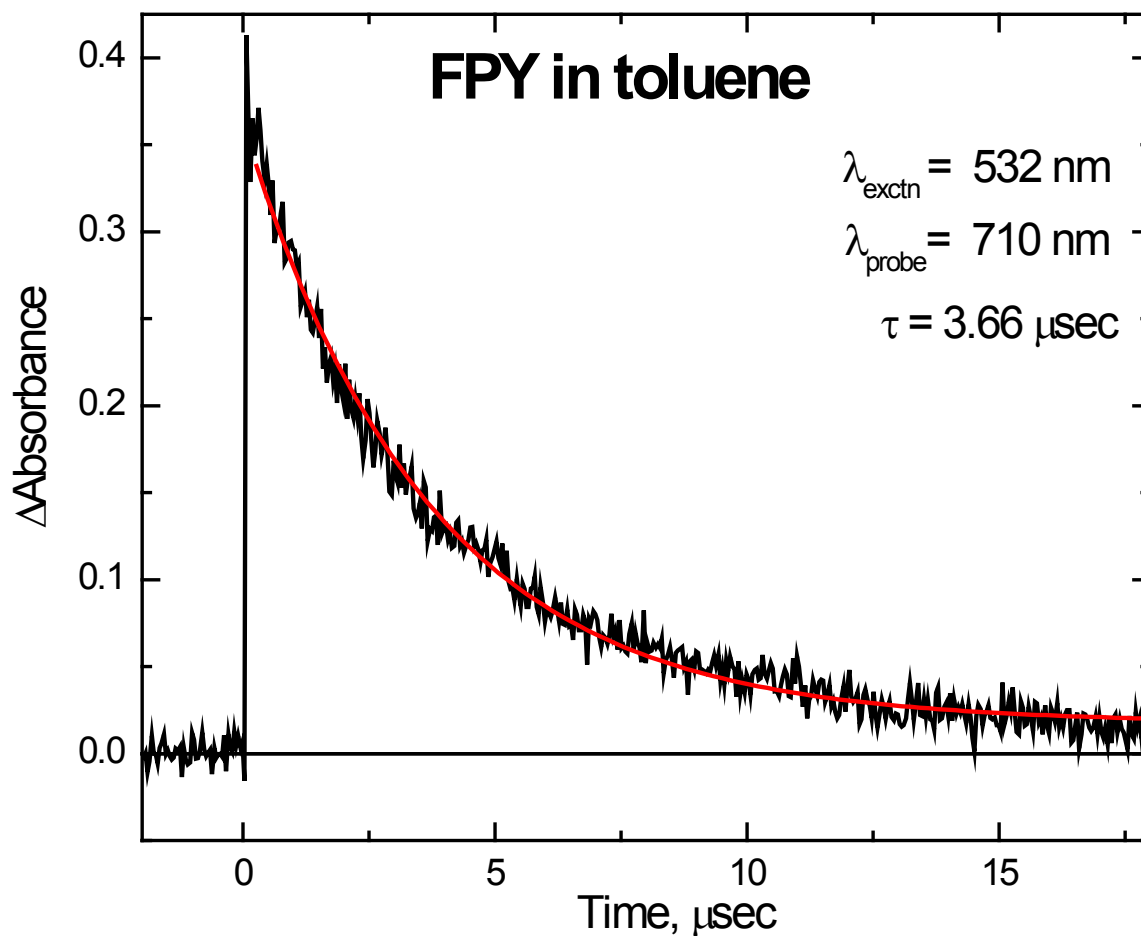

**Figure S7** The transient kinetic decays of FPY ( $6 \times 10^{-4} \text{ M}$ ) probed at 710 nm obtained by laser flash photolysis at 532 nm in Ar saturated toluene. The triplet of FPY has a lifetime of about 3.66  $\mu$ sec.
